# Supplementary material for: BCl3-mediated polycoupling of alkynes and aldehydes: a facile, metal-free multicomponent polymerization route to construct stereoregular functional polymers
Source: Royal Society of Chemistry journal article supplement (doi:10.1039/c6py00922k), 2016-01-01
Supplement: c6py00922k1.pdf [file c6py00922k1.pdf]

*Electronic Supporting Information*

BCl<sub>3</sub>-mediated polycoupling of alkyne and aldehyde: A facile,  
metal-free multicomponent polymerization route to  
stereoregular functional polymers

Yun Zhang,<sup>ab,†</sup> Nai-Wen Tseng,<sup>b,†</sup> Haiqin Deng,<sup>ab</sup> Ryan T. K. Kwok,<sup>ab</sup> Jacky W. Y. Lam,<sup>\*ab</sup> and  
Ben Zhong Tang<sup>\*abcd</sup>

<sup>a</sup> HKUST-Shenzhen Research Institute, No. 9 Yuexing 1st RD, South Area, Hi-tech Park,  
Nanshan, Shenzhen 518057, China.

<sup>b</sup> Department of Chemistry, Division of Life Science, State Key Laboratory of Molecular  
Neuroscience, Institute for Advanced Study, Institute of Molecular Functional Materials,  
Division of Biomedical Engineering, The Hong Kong University of Science and Technology  
(HKUST), Clear Water Bay, Kowloon, Hong Kong, China.

<sup>c</sup> Guangdong Innovative Research Team, SCUT-HKUST Joint Research Laboratory, State Key  
Laboratory of Luminescent Materials and Devices, South China University of Technology,  
Guangzhou 510640, China.

<sup>d</sup> Hong Kong Branch of Chinese National Engineering Research Center for Tissue Restoration  
and Reconstruction, HKUST, Clear Water Bay, Kowloon, Hong Kong, China.

\* Corresponding authors: J. W. Y. Lam (Email: [chjacky@ust.hk](mailto:chjacky@ust.hk)) or B. Z. Tang (Email:  
[tangbenz@ust.hk](mailto:tangbenz@ust.hk)).

## Table of contents

**Fig. S1** TGA thermograms of **P1/2** recorded under nitrogen at a heating rate of 10 °C/min.

**Fig. S2** IR spectra of (A) **1a**, (B) **2a** and (C) **P1a2a**.

**Fig. S3** (A) PL spectra of **P1a/2b** in THF/water mixtures with different water fractions. (B) Plot of relative emission intensity ( $I/I_0$ ) versus the composition of the aqueous mixture of **P1a/2b**. Solution concentration: 10  $\mu$ M; excitation wavelength: 350 nm.

**Fig. S4** (A) PL spectra of **P1a/2c** in THF/water mixtures with different water fractions. (B) Plot of relative emission intensity ( $I/I_0$ ) versus the composition of the aqueous mixture of **P1a/2c**. Solution concentration: 10  $\mu$ M; excitation wavelength: 350 nm.

**Fig. S5** (A) PL spectra of **P1a/2d** in THF/water mixtures with different water fractions. (B) Plot of relative emission intensity ( $I/I_0$ ) versus the composition of the aqueous mixture of **P1a/2d**. Solution concentration: 10  $\mu$ M; excitation wavelength: 350 nm.

**Fig. S6** (A) PL spectra of **P1a/2e** in THF/water mixtures with different water fractions. (B) Plot of relative emission intensity ( $I/I_0$ ) versus the composition of the aqueous mixture of **P1a/2e**. Solution concentration: 10  $\mu$ M; excitation wavelength: 350 nm.

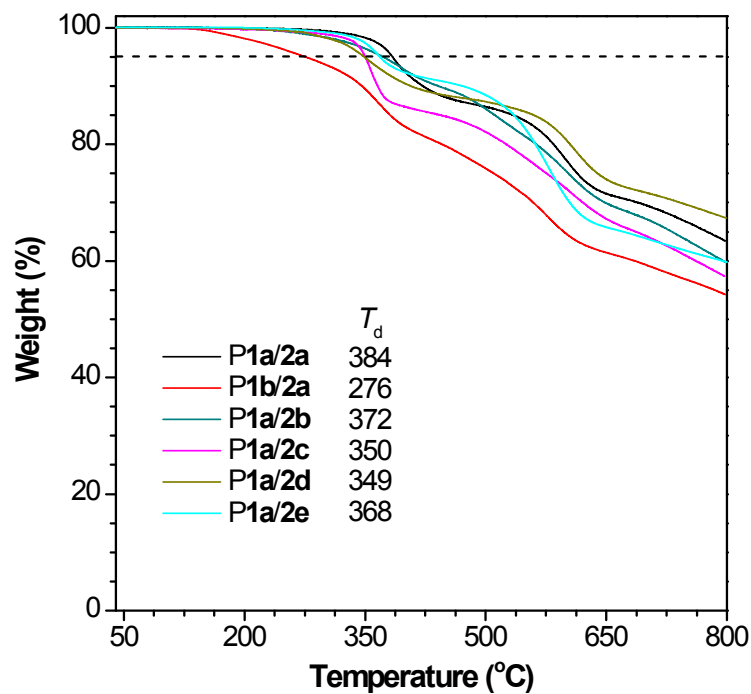

**Fig. S1** TGA thermograms of P1/2 recorded under nitrogen at a heating rate of 10 °C/min.

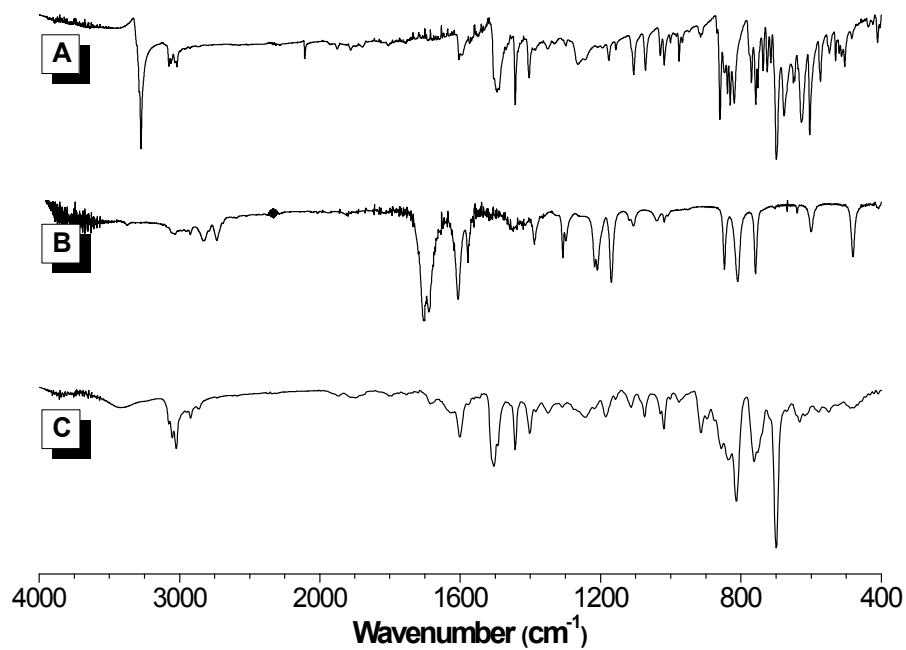

**Fig. S2** IR spectra of (A) 1a, (B) 2a and (C) P1a2a.

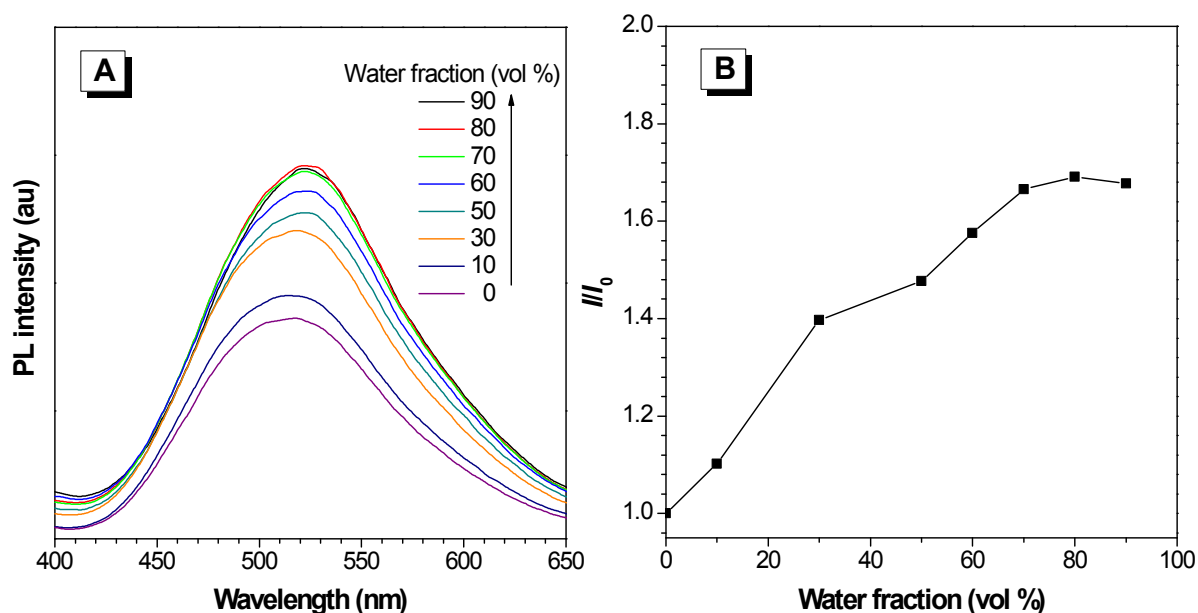

**Fig. S3** (A) PL spectra of P1a/2b in THF/water mixtures with different water fractions. (B) Plot of relative emission intensity ( $I/I_0$ ) versus the composition of the aqueous mixture of P1a/2b. Solution concentration: 10  $\mu$ M; excitation wavelength: 350 nm.

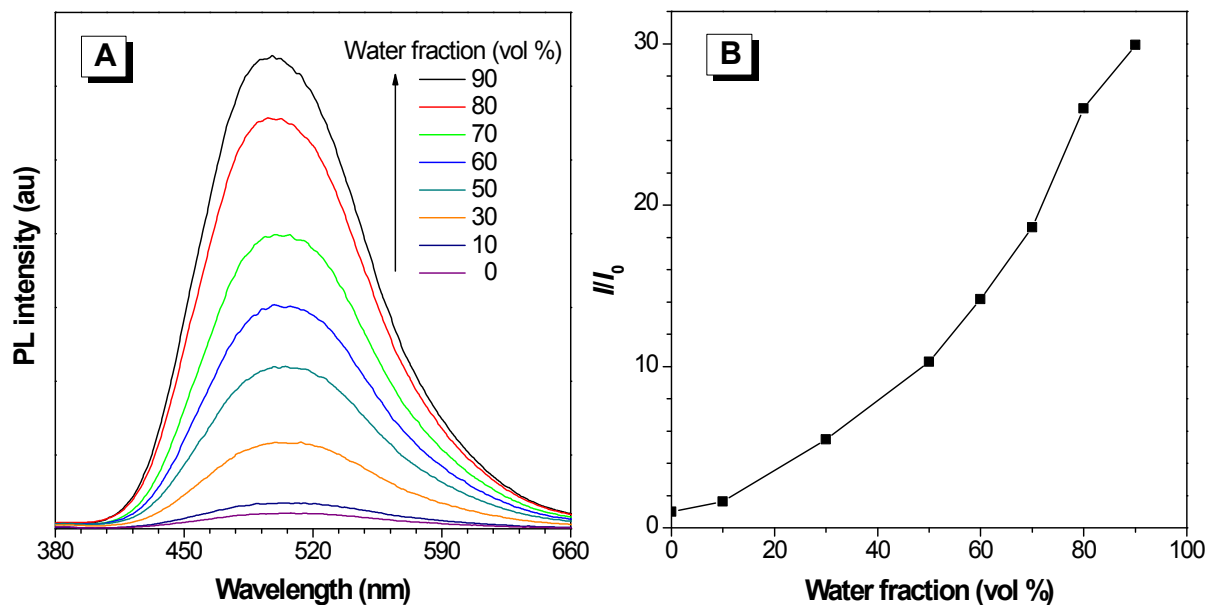

**Fig. S4** (A) PL spectra of P1a/2c in THF/water mixtures with different water fractions. (B) Plot of relative emission intensity ( $I/I_0$ ) versus the composition of the aqueous mixture of P1a/2c. Solution concentration: 10  $\mu$ M; excitation wavelength: 350 nm.

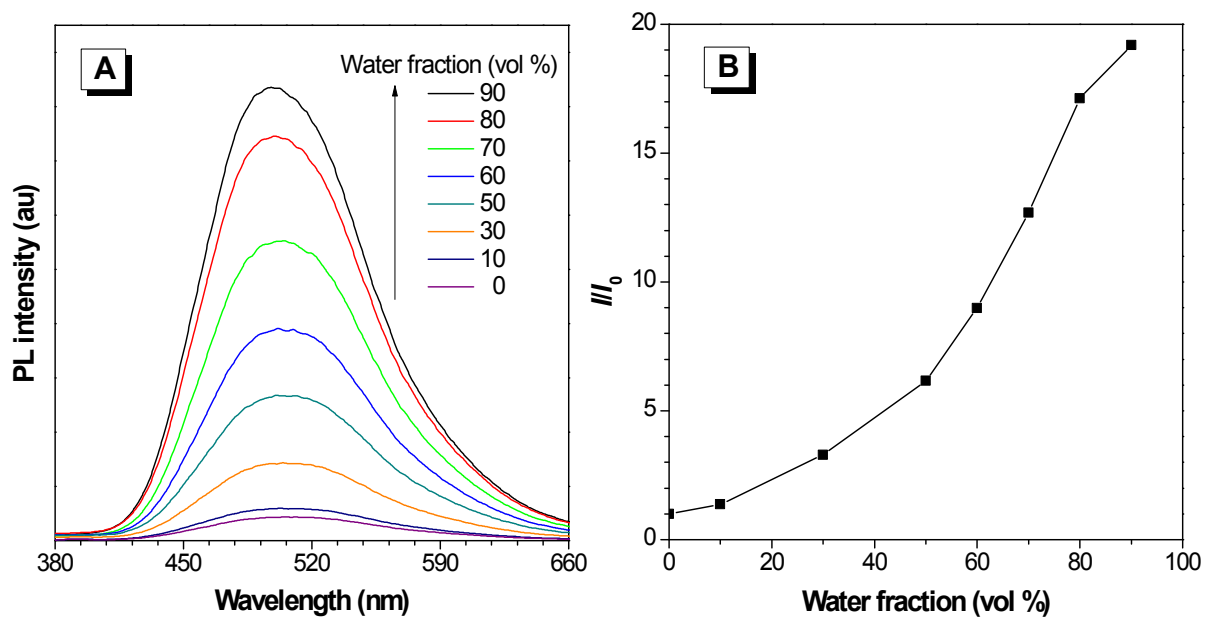

**Fig. S5** (A) PL spectra of P1a/2d in THF/water mixtures with different water fractions. (B) Plot of relative emission intensity ( $I/I_0$ ) versus the composition of the aqueous mixture of P1a/2d. Solution concentration: 10  $\mu$ M; excitation wavelength: 350 nm.

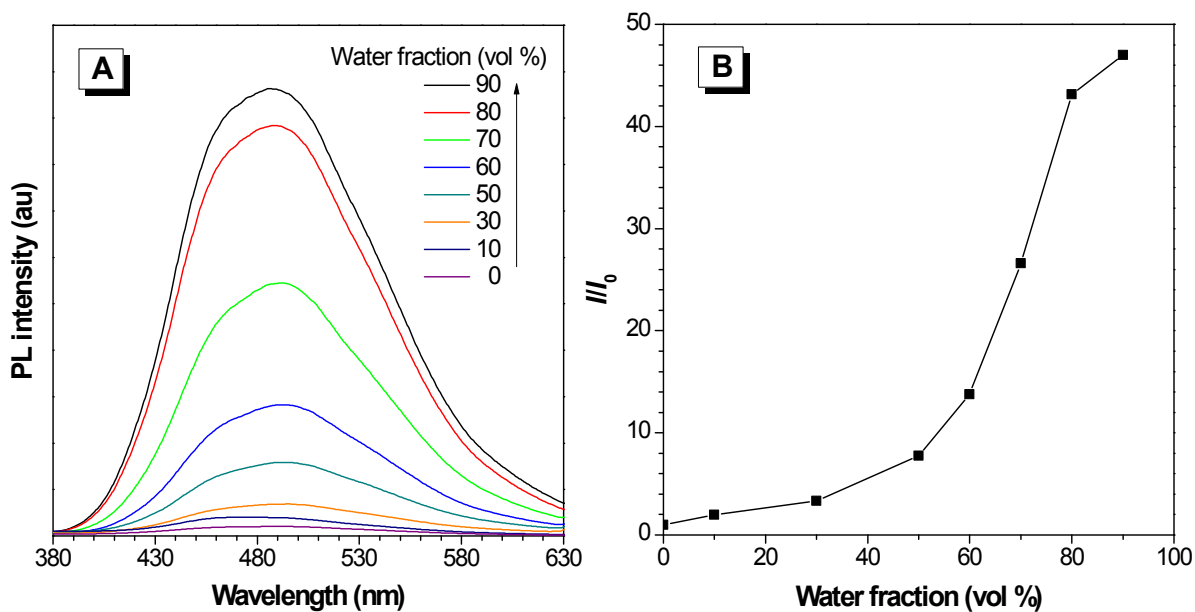

**Fig. S6** (A) PL spectra of P1a/2e in THF/water mixtures with different water fractions. (B) Plot of relative emission intensity ( $I/I_0$ ) versus the composition of the aqueous mixture of P1a/2e. Solution concentration: 10  $\mu$ M; excitation wavelength: 350 nm.
